# Supplementary material for: Singlet oxygen quenching as a probe for cytochrome c molten globule state formation
Source: Royal Society of Chemistry journal article supplement (doi:10.1039/d2cp01281b), 2022-01-01
Supplement: d2cp01281b1.pdf [file d2cp01281b1.pdf]

## **Supporting information**

### **Singlet oxygen quenching as a probe of cytochrome *c* molten globule state formation**

Andrej Hovan, Dagmar Sedláková, Martin Berta,  
Gregor Bánó and Erik Sedlák

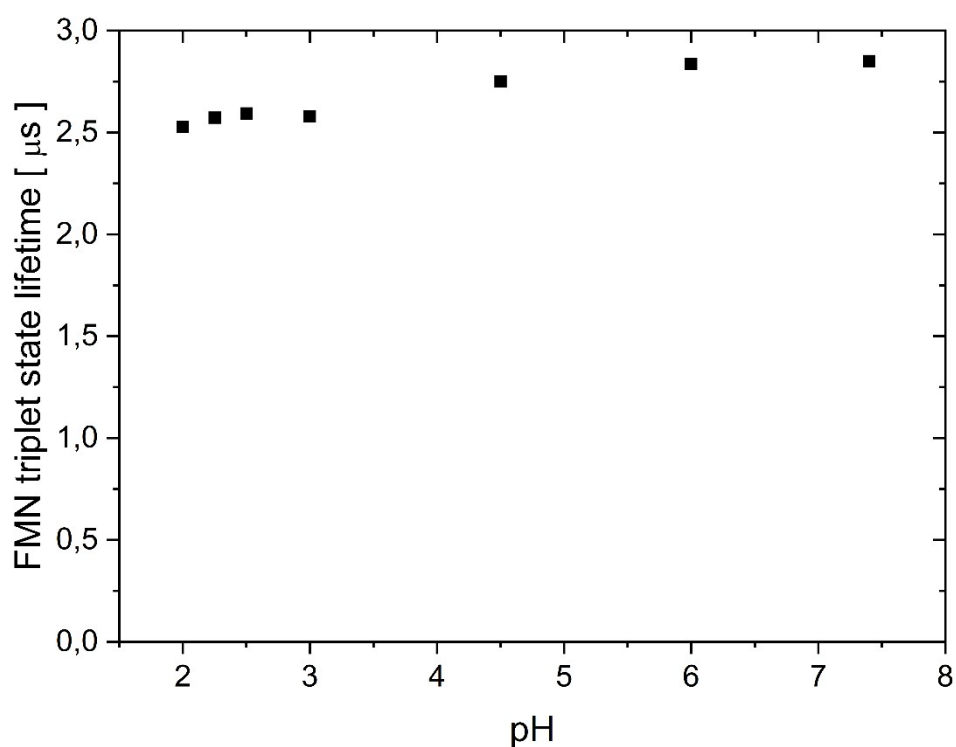

**Figure S1.** The pH dependence of FMN triplet state lifetime indicates slight changes, decreasing from  $\tau_{\text{FMN}} = 2.8 \mu\text{s}$  at pH 7 to  $\tau_{\text{FMN}} = 2.5 \mu\text{s}$  at pH 2.

**Table S1.** The values of  $\tau_{\text{FMN}}$  and  $\tau_{\Delta}$  obtained in the presence and in the absence of cytochrome c in the presence of 300 mM salts at pH 2.

| No salt       |                             |                         | 300 mM Na <sub>2</sub> SO <sub>4</sub> |                             |                         | 300 mM NaCl   |                             |                         | 300 mM NaClO <sub>4</sub> |                             |                         |
|---------------|-----------------------------|-------------------------|----------------------------------------|-----------------------------|-------------------------|---------------|-----------------------------|-------------------------|---------------------------|-----------------------------|-------------------------|
| cyt c<br>(μM) | $\tau_{\text{FMN}}$<br>(μs) | $\tau_{\Delta}$<br>(μs) | cyt c<br>(μM)                          | $\tau_{\text{FMN}}$<br>(μs) | $\tau_{\Delta}$<br>(μs) | cyt c<br>(μM) | $\tau_{\text{FMN}}$<br>(μs) | $\tau_{\Delta}$<br>(μs) | cyt c<br>(μM)             | $\tau_{\text{FMN}}$<br>(μs) | $\tau_{\Delta}$<br>(μs) |
| 0             | 2.5                         | 3.4                     | 0                                      | 3                           | 3.3                     | 0             | 2.5                         | 3.5                     | 0                         | 2.8                         | 3.4                     |
| 100           | 1.4                         | 1.6                     | 100                                    | 2.4                         | 2.9                     | 100           | 1.8                         | 2.6                     | 25                        | 2.4                         | 3.2                     |

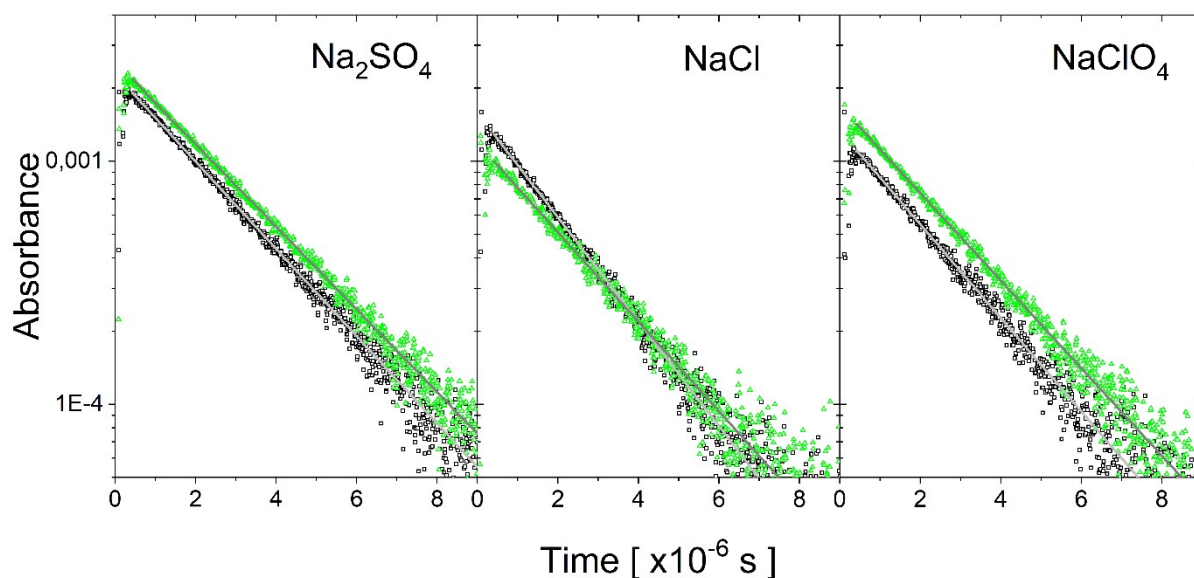

**Figure S2.** The moving average of 20 points of typical FMN triplet state absorbance in the presence of 20  $\mu\text{M}$  cytochrome *c* and 10 mM salt (open **black** squares) and 100 mM salt (open **green** triangles). The light gray (10 mM salt) and gray (100 mM) curves show single exponential fit to the measured data.

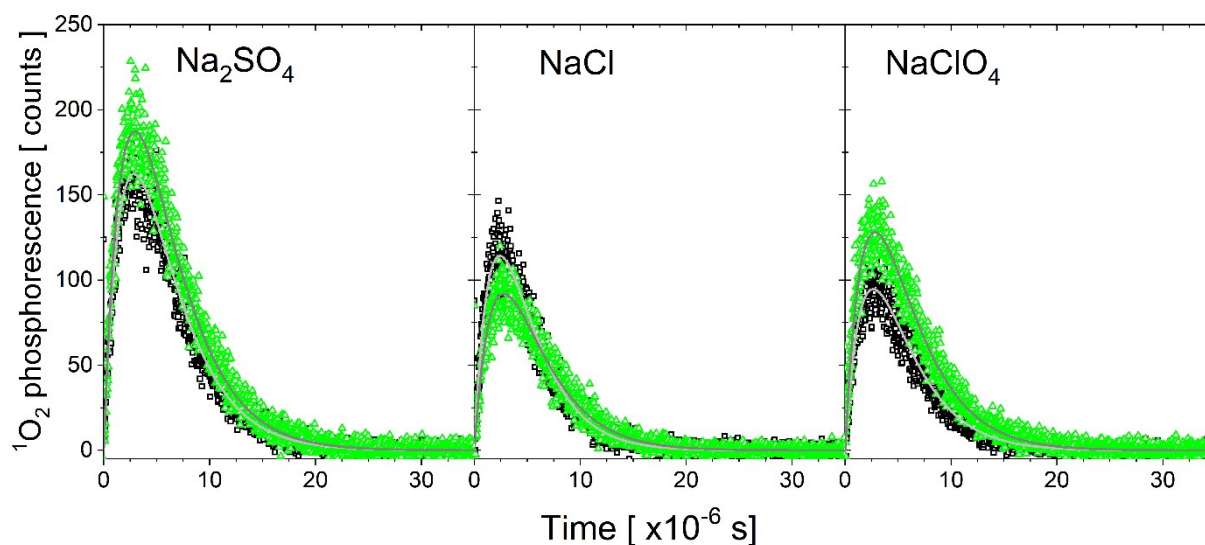

**Figure S3.** The typical singlet oxygen phosphorescence kinetics in the presence of 20  $\mu\text{M}$  cytochrome *c* and 10 mM salt (open **black** squares) and 100 mM salt (open **green** triangles). The light gray (10 mM salt) and gray (100 mM) curves show conventional double exponential (**Equation 2** of main article) fit of the measured data.

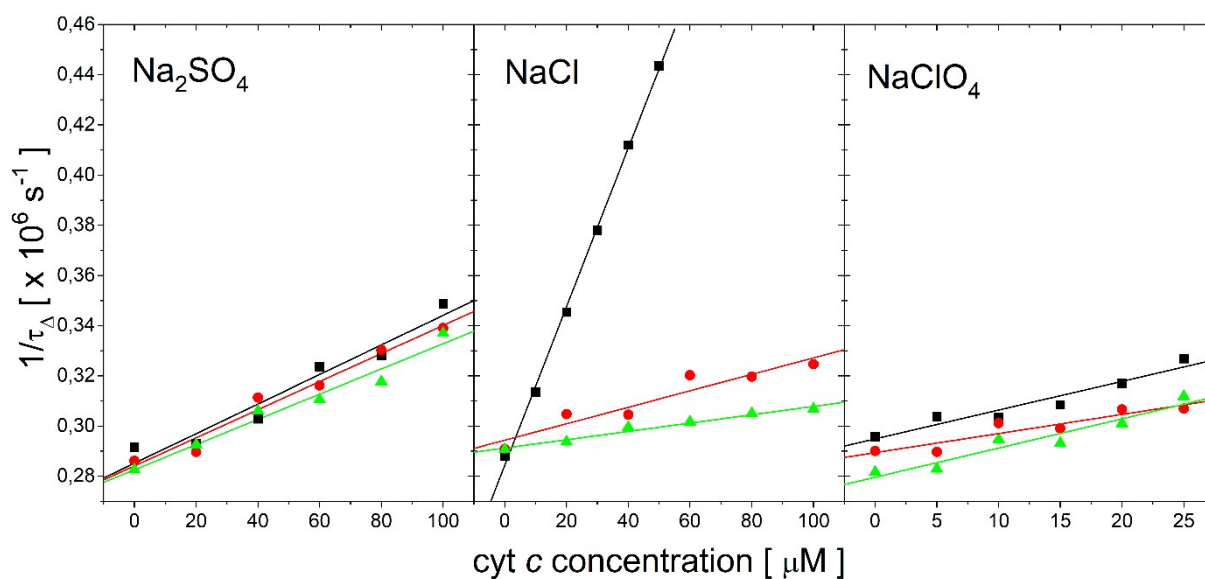

**Figure S4.** The inverse of singlet oxygen lifetime  $\tau_{\Delta}$  plotted against cytochrome *c* concentration with different salt concentrations – 10 mM (black squares), 50 mM (red circles) and 100 mM (green triangles).

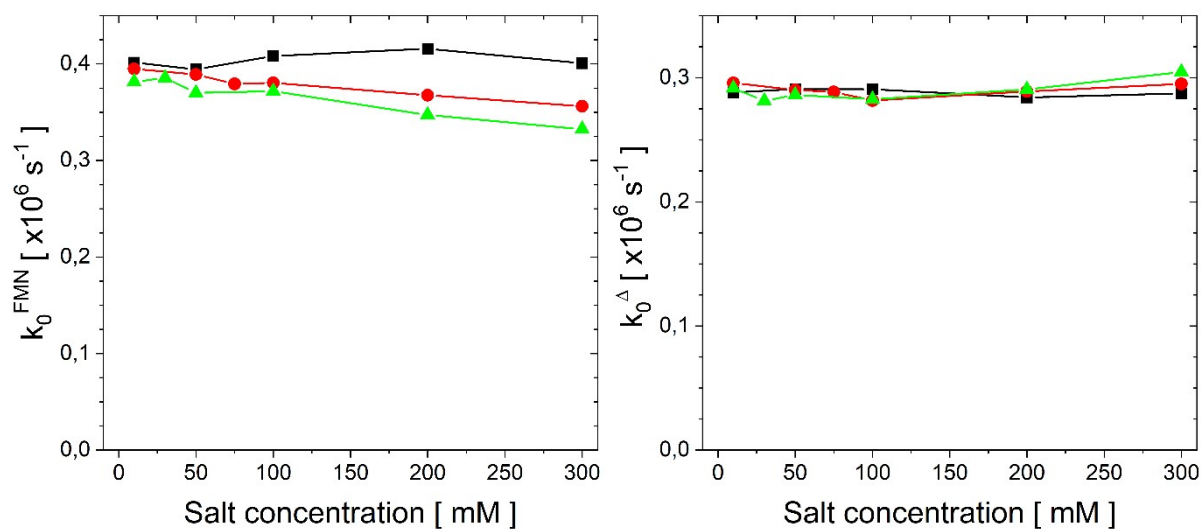

**Figure S5.** The salt concentration dependences of the first order rate constants for singlet oxygen and FMN triplet state quenching in the absence of cytochrome *c* in 5 mM glycine buffer, pH 2, in the presence of  $\text{Na}_2\text{SO}_4$  (green triangles),  $\text{NaCl}$  (black squares), and  $\text{NaClO}_4$  (red circles). The typical error of the presented points is around  $0.003 \times 10^6 \text{ s}^{-1}$  for both  $k_0^{\Delta}$  and  $k_0^{\text{FMN}}$ .
